# Supplementary material for: Hierarchically triangular prism structured Co3O4: self-supported fabrication and photocatalytic property
Source: Royal Society of Chemistry journal article supplement (doi:10.1039/c1nr10826c), 2011-01-01
Supplement: c1nr10826c.pdf [file c1nr10826c.pdf]

## Supplementary Information

# Hierarchically triangular prism structured $\text{Co}_3\text{O}_4$ : Self-supported fabrication and photocatalytic property

Jiahui Kou<sup>a</sup>, Christina Bennett-Stamper<sup>b</sup> and Rajender S. Varma<sup>a\*</sup>

<sup>a</sup> Sustainable Technology Division, <sup>b</sup> Water Supply Water Resources Division, National Risk Management Research Laboratory, U.S. Environmental Protection Agency, 26 West Martin Luther King Drive, MS 443, Cincinnati, Ohio 45268, USA

Email: [Varma.Rajender@epa.gov](mailto:Varma.Rajender@epa.gov)

### Experimental:

The phase purity crystal structures of as-synthesized samples were detected by an X-ray diffractometer (XRD) (Xpert, Pro, Holland). The morphology was examined by transmission electron microscopy (TEM) (JEOL, JEM-2100, Japan), scanned electron microscopy (SEM) (JEOL, JSM-6490LV, Japan), and field emission scanned electron microscopy (FESEM) (JEOL, JSM-7600F, Japan). The surface area was analyzed using the surface area and porosity analyzer (Tri-star 3000, Micromeritics, U.S.A.) by nitrogen adsorption at 77 K using the Brunauer-Emmett-Teller (BET) method. The concentration of oxidized products from isopropanol (IPA) was detected by the gas chromatograph-mass spectrometry (GC-MS, Agilent 6890N/5973I, USA). The quantification of production was based on the external standard and the use of calibration curve.

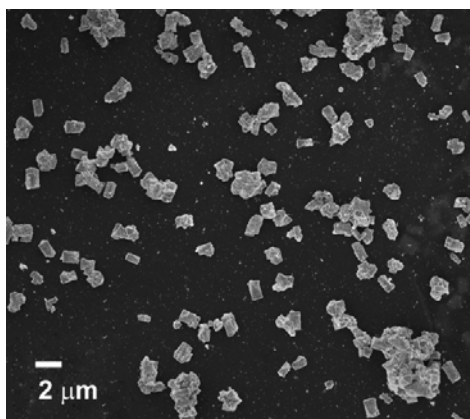

Fig. 1 Low magnification SEM image of triangular prism

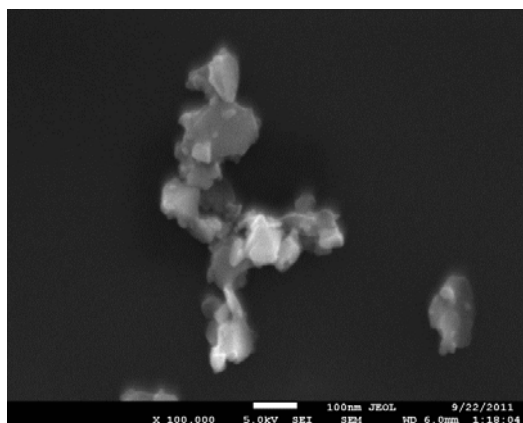

Fig. S2 SEM image – ammonia (1 mL)

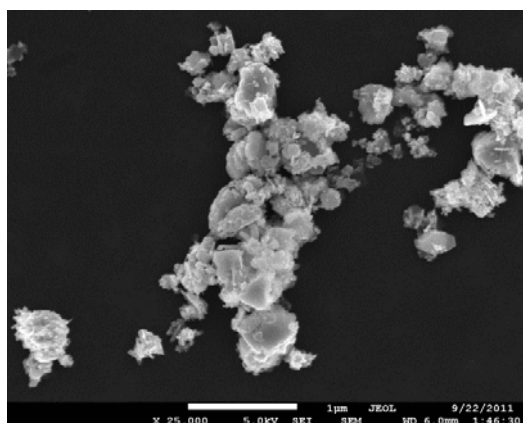

Fig. S3 SEM image – ammonia (5 mL)

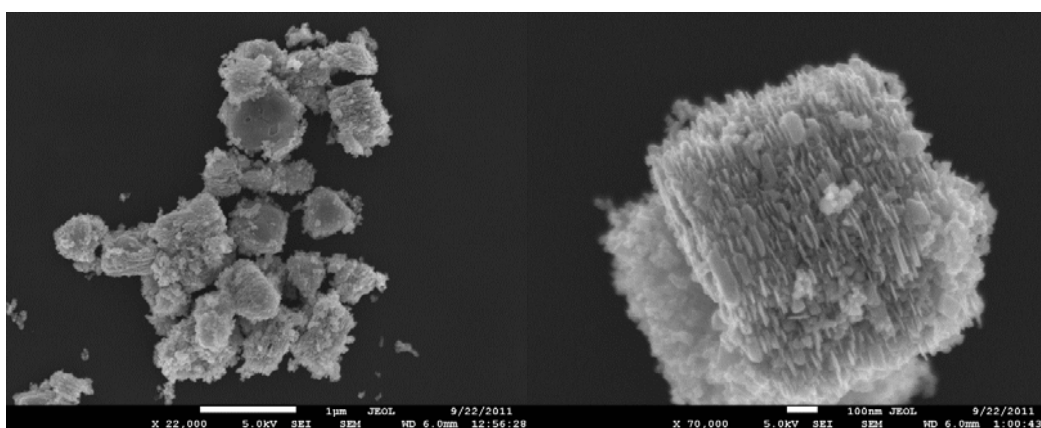

Fig. S4 SEM image – ammonia (20 mL)

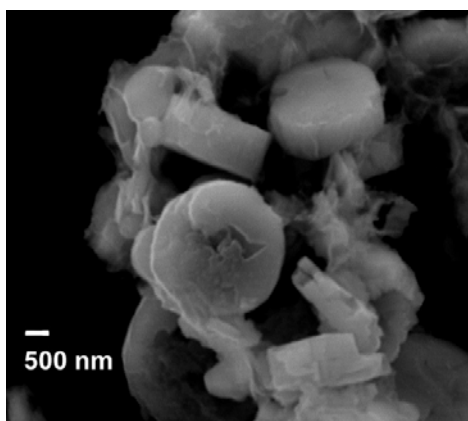

Fig. S5 SEM image of as-synthesized sample in the absence of  $\text{Na}_3\text{PO}_4$

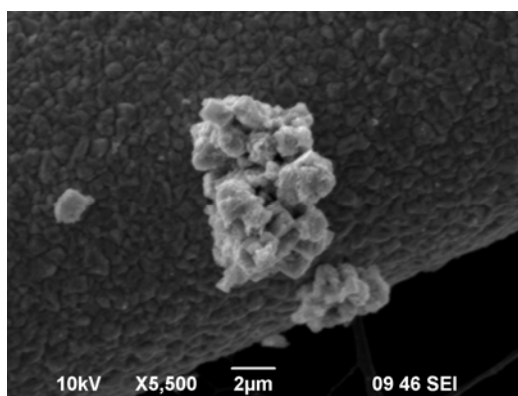

Fig. S6 SEM image – molar ratio  $\text{Na}_3\text{PO}_4:\text{Co}(\text{Ac})_2$  (1:1)

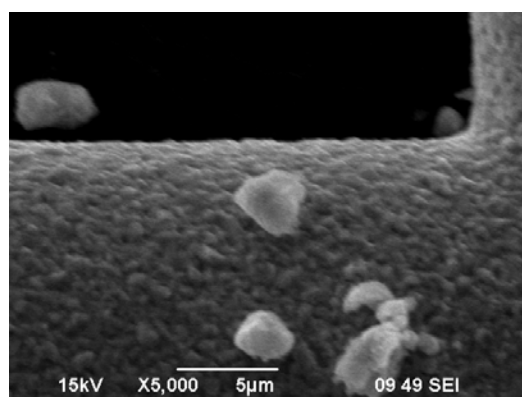

Fig. S7 SEM image – molar ratio  $\text{Na}_3\text{PO}_4:\text{Co}(\text{Ac})_2$  (1.8:1)

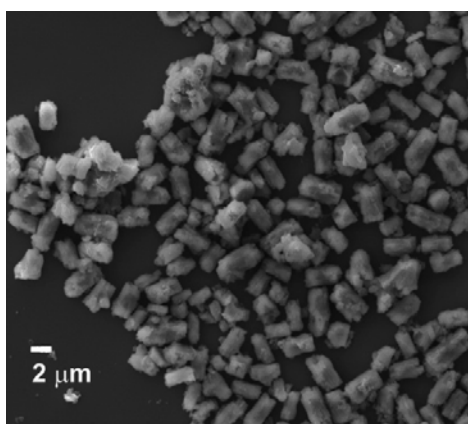

Fig. S8 Low magnification SEM image of trunk-like sample

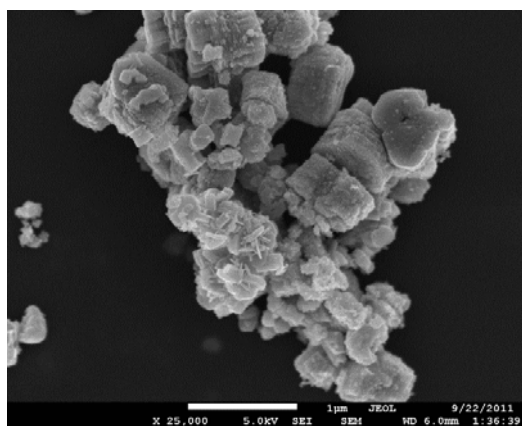

Fig. S9 SEM image – Using 0.1 mol NaOH

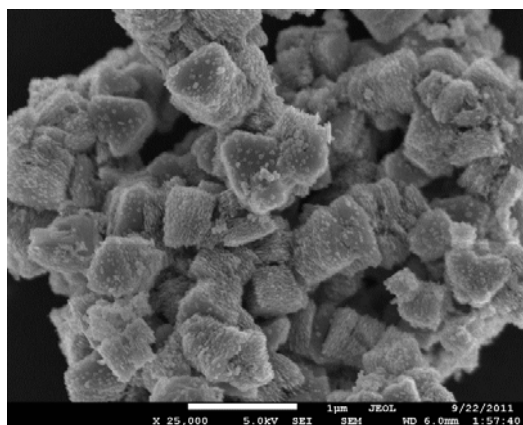

Fig. S10 SEM image – Using 0.2 mol NaOH

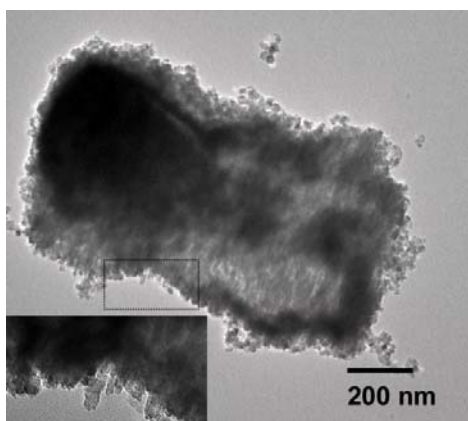

Fig. S11 TEM image of a typical triangular prism  $\text{Co}_3\text{O}_4$

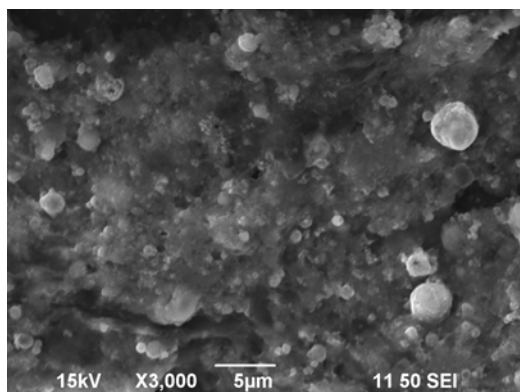

Fig. S12 Morphology of  $\text{NH}_4\text{CoPO}_4$

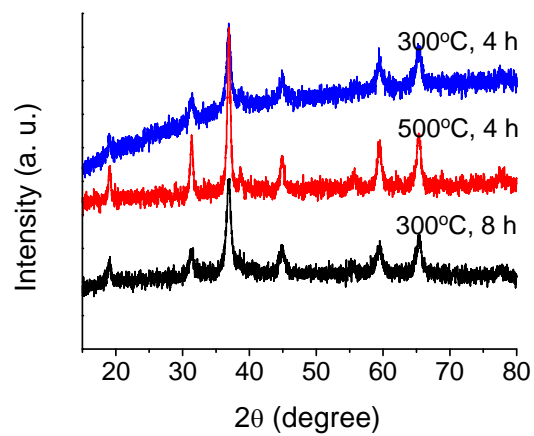

Fig. S13 XRD patterns of  $\text{Co}_3\text{O}_4$  at different calcination conditions
